# Supplementary material
Source: PubMed Central journal article supplement (PMC7596739)
Supplement: aim-olf-L201257-L20-1257_Supplement.pdf [file aim-olf-L201257-L20-1257_Supplement.pdf]

## Supplementary Material\*

Hernandez AV, Roman YM, Pasupuleti V, et al. Update alert 3: hydroxychloroquine or chloroquine for the treatment or prophylaxis of COVID-19. *Ann Intern Med.* 21 October 2020. [Epub ahead of print]. doi:10.7326/L20-1257

| <b>Item</b>                                                                          | <b>Page</b> |
|--------------------------------------------------------------------------------------|-------------|
| <i>Supplement Table.</i> Effect of Hydroxychloroquine Reported in Controlled Studies | 2           |

\* This supplementary material was provided by the authors to give readers further details on their article. The material was reviewed but not copyedited.

**Supplement Table. Effect of Hydroxychloroquine Reported in Controlled Studies**

| Name                                                     | Type   | RoB | Unadjusted Absolute effect of HCQ vs. Control (95% CI)        | SOE |
|----------------------------------------------------------|--------|-----|---------------------------------------------------------------|-----|
| <i>All-Cause Mortality</i>                               |        |     |                                                               |     |
| Abd-Elsalam <sup>4</sup>                                 | RCT    | H   | HCQ: 6/97 vs. 5/97; RD 1.0% (-5.5% to 7.5%)                   | L   |
| Cavalcanti <sup>10</sup>                                 |        | H   | HCQ: 5/159 vs. 5/173; RD 0.3% (-3.4% to 3.9%)                 |     |
| Cavalcanti <sup>10</sup>                                 |        | H   | HCQ+AZ: 3/172 vs. 5/173; RD -1.2% (-4.3% to 2.0%)             |     |
| Mitjà <sup>11</sup>                                      |        | SC  | HCQ: 0/136 vs. 0/157; RD 0% (NA)                              |     |
| Skipper <sup>12</sup>                                    |        | H   | HCQ: 1/201 vs. 1/194; RD -0.02% (-1.4% to 1.4%)               |     |
| Horby <sup>13</sup>                                      |        | SC  | HCQ: 418/1561 vs. 788/3155; RD 1.8% (-0.9% to 4.5%)           |     |
| C-P Chen <sup>14</sup>                                   |        | SC  | HCQ: 0/21 vs. 0/12; RD 0% (NA)                                |     |
| J Chen <sup>15</sup>                                     |        | SC  | HCQ: 0/15 vs. 0/15; RD 0% (NA)                                |     |
| L Chen <sup>16</sup>                                     |        | H   | HCQ: 0/15 vs. 0/12; RD 0% (NA)                                |     |
| Sulaiman <sup>5</sup>                                    | Cohort | S   | HCQ: 7/1817 vs. 54/3724; RD -1.1% (-1.5% to -0.6%) †          | L   |
| Catteau <sup>6</sup>                                     |        | S   | HCQ: 804/4542 vs. 957/3533; RD -9.4% (-11.2% to -7.5%) †      |     |
| Di Castelnovo <sup>7</sup>                               |        | S   | HCQ: 386/2634 vs. 190/817; RD -8.6% (-11.8% to -5.4%) †       |     |
| Ip <sup>8</sup>                                          |        | S   | HCQ: 2/97 vs. 44/970; RD -2.5% (-5.6% to 0.6%)                |     |
| Kalligeros <sup>9</sup>                                  |        | S   | HCQ±AZ: NA/36 vs. NA/72; aHR 0.82 (0.20 to 3.24)*             |     |
| Paccoud <sup>17</sup>                                    |        | S   | HCQ: 3/38 vs. 6/46; RD -5.2% (-18.1% to 7.8%)                 |     |
| Lecronier <sup>18</sup>                                  |        | C   | HCQ: 9/38 vs. 9/22; RD -17.2% (-41.8% to 7.4%)                |     |
| Barbosa <sup>19</sup>                                    |        | C   | HCQ: 4/31 vs. 1/32; RD 9.8% (-3.5% to 23.3%)                  |     |
| Magagnoli <sup>20</sup>                                  |        | S   | HCQ±AZ: 27/97 vs. 18/158; RD 16.4% (6.2% to 26.6%) †          |     |
| Mallat <sup>21</sup>                                     |        | S   | HCQ: 0/23 vs. 0/11 [0%]; RD 0% (NA)                           |     |
| Membrillo <sup>22</sup>                                  |        | C   | HCQ: 27/123 vs. 21/43; RD -26.9% (-43.5% to -10.3%) †         |     |
| Geleris <sup>23</sup>                                    |        | M   | HCQ±AZ: 157/811 vs. 75/565; RD 6.1% (2.2% to 10%) †           |     |
| Rosenberg <sup>24</sup>                                  |        | S   | HCQ±AZ: 54/271 vs. 28/221; RD 7.3% (0.8% to 13.7%) †          |     |
| Mahévas <sup>25</sup>                                    |        | S   | HCQ: 9/84 vs. 8/97; RD 2.5% (-6.1% to 11.1%)                  |     |
| Ip <sup>26</sup>                                         |        | S   | HCQ: 383/1914 vs. 120/598; RD -0.1% (-3.7% to 3.6%)           |     |
| Sbidian <sup>27</sup>                                    |        | M   | HCQ: 111/623 vs. 830/3792; RD -4.1% (-7.4% to 0.8%)           |     |
| Singh <sup>28</sup>                                      |        | S   | HCQ: 104/910 vs. 109/910; RD -0.6% (-3.5% to 2.4%)            |     |
| Yu <sup>29</sup>                                         |        | S   | HCQ: 9/48 vs. 238/502; RD -29.7% (-40.5% to -16.8%) †         |     |
| Arshad <sup>30</sup>                                     |        | S   | HCQ±AZ: 162/1202 vs. 108/409; RD -12.9% (-17.6% to -8.2%) †   |     |
| <i>Composite of Intubation or Death</i>                  |        |     |                                                               |     |
| Horby <sup>13</sup>                                      | RCT    | SC  | HCQ: 388/1300 vs. 696/2623; RD 3.3% (0.3% to 6.3%) †          | L   |
| Geleris <sup>23</sup>                                    | Cohort | M   | HCQ±AZ: 262/811 vs. 84/565; RD 17.4% (13.1% to 21.8%) †       | I   |
| <i>Composite of ICU Admission Within 7-Days or Death</i> |        |     |                                                               |     |
| Paccoud <sup>17</sup>                                    | Cohort | S   | HCQ: [By 12 days] 13/38 vs. 16/46; RD -0.6% (-21.0% to 19.9%) | I   |
| Mahévas <sup>31</sup>                                    |        | S   | HCQ: 16/84 vs. 21/97; RD -2.6% (-14.3% to 9.1%)               |     |
| <i>ICU Admission</i>                                     |        |     |                                                               |     |
| Sulaiman <sup>5</sup>                                    | Cohort | S   | HCQ: 14/1817 vs. 56/3724; RD -0.7% (-1.3% to -0.2%) †         | I   |

|                                       |        |    |                                                                                                                                      |   |
|---------------------------------------|--------|----|--------------------------------------------------------------------------------------------------------------------------------------|---|
| Catteau <sup>6</sup>                  |        | S  | HCQ: 313/4539 vs. 96/3529; RD 4.2% (3.3% to 5.1%) †                                                                                  |   |
| Ip <sup>8</sup>                       |        | S  | HCQ: 3/97 vs. 42/970; RD -1.3% (-4.9% to 2.4%)                                                                                       |   |
| Rosenberg <sup>24</sup>               |        | S  | HCQ±AZ: 52/271 vs. 27/221; RD 7% (0.6% to 13.3%) †                                                                                   |   |
| <b>Survival without ICU Admission</b> |        |    |                                                                                                                                      |   |
| Mahévas <sup>25</sup>                 | Cohort | S  | HCQ: 17/84 vs. 22/89; RD -4.5% (-16.9% to 7.9%)                                                                                      | I |
| <b>Need of Mechanical Ventilation</b> |        |    |                                                                                                                                      |   |
| Abd-Elsalam <sup>4</sup>              | RCT    | H  | HCQ: 4/97 vs. 5/97; RD -1.0% (-6.9% to 4.9%)                                                                                         |   |
| Cavalcanti <sup>10</sup>              |        | H  | HCQ: 12/159 vs. 12/173; RD 0.6% (-5.0% to 6.2%)                                                                                      | L |
| Cavalcanti <sup>10</sup>              |        | H  | HCQ+AZ: 19/172 vs. 12/173; RD 4.1% (-1.9% to 10.1%)                                                                                  |   |
| Mitjà <sup>11</sup>                   |        | SC | HCQ: 0/136 vs. 0/157; RD 0% (NA)                                                                                                     |   |
| Horby <sup>13</sup>                   |        | SC | HCQ: 118/1300 vs. 215/2623; RD 0.9% (-1.0% to 2.8%)                                                                                  |   |
| Lecronier <sup>18</sup>               | Cohort | C  | HCQ: 5/38 vs. 2/22; RD 4.1% (-12.1% to 20.2%)                                                                                        | L |
| Magagnoli <sup>20</sup>               |        | S  | HCQ±AZ: 12/90 vs. 25/177; RD -0.8% (-9.5% to 7.9%)                                                                                   |   |
| Mallat <sup>21</sup>                  |        | S  | HCQ: 0/23 vs. 0/11; RD 0% (NA)                                                                                                       |   |
| Geleris <sup>23</sup>                 |        | M  | HCQ±AZ: 154/811 vs. 26/565; RD 14.4% (11.2% to 17.6%) †                                                                              |   |
| Rosenberg <sup>24</sup>               |        | S  | HCQ±AZ: 51/271 vs. 18/221; RD 10.7% (4.8% to 16.6%) †                                                                                |   |
| Singh <sup>28</sup>                   |        | S  | HCQ: 46/910 vs. 57/910; RD -1.2% (-3.3% to 0.9%)                                                                                     |   |
| <b>Severe Disease Progression</b>     |        |    |                                                                                                                                      |   |
| J Chen <sup>15</sup>                  | RCT    | SC | HCQ: 1/15 vs. 0/15; RD 6.7% (-6.0% to 19.3%)                                                                                         | I |
| L Chen <sup>16</sup>                  |        | H  | HCQ: 0/15 vs. 0/12; RD 0% (NA)                                                                                                       |   |
| Z Chen <sup>32</sup>                  |        | SC | HCQ: 0/31 vs. 4/31; RD -12.9% (-24.7% to -1.1%) †                                                                                    |   |
| Barbosa <sup>19</sup>                 | Cohort | C  | HCQ: [Respiratory support level] +0.63±0.79 vs. +0.16±0.64 points; MD 0.47 (0.11 to 0.83) †                                          | I |
| Mallat <sup>21</sup>                  |        | S  | HCQ: [High flow oxygen therapy] 0/23 vs. 0/11; RD 0% (NA)                                                                            |   |
| Mahévas <sup>31</sup>                 |        | S  | HCQ: [ARDS] 24/84 vs. 23/95; RD 4.4% (-8.6% to 17.3%)                                                                                |   |
| <b>Hospitalization</b>                |        |    |                                                                                                                                      |   |
| Mitjà <sup>11</sup>                   | RCT    | SC | HCQ: 8/136 vs. 11/157; RD -1.1% (-6.7% to 4.5%)                                                                                      | L |
| Skipper <sup>12</sup>                 |        | H  | HCQ: 4/212 vs. 10/211; RD: -2.9% (-6.3% to 0.6%)                                                                                     |   |
| Sulaiman <sup>5</sup>                 | Cohort | S  | HCQ: 171/1817 vs. 617/3724; RD -7.2% (-9.0% to -5.4%) †                                                                              | I |
| Ip <sup>8</sup>                       |        | S  | HCQ: 21/97 vs. 305/970; RD -9.8% (-18.5% to -1.1%) †                                                                                 |   |
| Komissarov <sup>33</sup>              |        | C  | HCQ: 7/33 vs. 0/10; RD 21.2% (7.3% to 35.2%) †                                                                                       |   |
| <b>Discharge from Hospital</b>        |        |    |                                                                                                                                      |   |
| Horby <sup>13</sup>                   | RCT    | SC | HCQ: 941/1561 vs. 1982/3155; RD -2.5% (-5.5% to 0.4%)                                                                                | L |
| Paccoud <sup>17</sup>                 | Cohort | S  | HCQ: 21/38 vs. 26/46; RD -1.3% (-22.6% to 20.1%)                                                                                     | I |
| Mahévas <sup>25</sup>                 |        | S  | HCQ: 67/84 vs. 71/89; RD 0% (-12% to 12%)                                                                                            |   |
| Sbidian <sup>27</sup>                 |        | M  | HCQ: 351/623 vs. 1507/3792; RD 16.6% (12.4% to 20.8%)                                                                                |   |
| <b>Symptom Resolution</b>             |        |    |                                                                                                                                      |   |
| Skipper <sup>12</sup>                 | RCT    | H  | HCQ: [At 14 days:] 152/201 vs. 135/194; RD 6.0% (-2.7% to 14.8%)                                                                     | I |
| J Chen <sup>15</sup>                  |        | SC | HCQ: [Fever] 1 vs. 1 day; MD 0 days (NA)                                                                                             |   |
| L Chen <sup>16</sup>                  |        | H  | HCQ: [Days to recovery [Median(IQR)]]: 6 (3-8) vs. 7.5 (5-16.3)                                                                      |   |
| Z Chen <sup>32</sup>                  |        | SC | HCQ: [Fever] 2.2±0.4 vs. 3.2±1.3 days; MD -1 day (-1.5 to -0.5) †<br>[Cough] 2.0±0.2 vs. 3.1±1.5 days; MD -1.1 days (-1.6 to -0.6) † |   |
| Tang <sup>34</sup>                    |        | H  | HCQ: [Composite symptom resolution] 32/64 vs. 24/55; RD 6.4% (-11.6% to 24.3%)                                                       |   |
| Abd-Elsalam <sup>4</sup>              |        | H  | HCQ: [Complete recovery] 52/97 vs. 33/97; RD 19.5% (5.9% to 33.3%)                                                                   |   |
| Kalligeros <sup>9</sup>               | Cohort | S  | HCQ±AZ: [Days to improvement] MD +0.23 days (-1.87 to 2.33)**                                                                        | I |

|                                                    |        |    |                                                                                                |   |
|----------------------------------------------------|--------|----|------------------------------------------------------------------------------------------------|---|
|                                                    |        |    | HCQ±AZ: [Days to fever resolution] MD +1.27 days (-0.49 to 3.03)**                             |   |
| <b>Progression of Pulmonary Lesions on CT Scan</b> |        |    |                                                                                                |   |
| J Chen <sup>15</sup>                               | RCT    | SC | HCQ: 5/15 vs. 7/15; RD -13.3% (-48.1% to 21.4%)                                                | L |
| Z Chen <sup>32</sup>                               |        | SC | HCQ: 2/31 vs. 9/31; RD -22.6% (-40.8% to -4.4%) †                                              |   |
| <b>Improvement in Pulmonary Lesions on CT Scan</b> |        |    |                                                                                                |   |
| Z Chen <sup>32</sup>                               | RCT    | SC | HCQ: 25/31 vs. 17/31; RD 25.8% (3.4% to 48.2%) †                                               | I |
| <b>Upper Respiratory Virological Clearance</b>     |        |    |                                                                                                |   |
| C-P Chen <sup>14</sup>                             | RCT    | SC | HCQ: [Day 14] 17/21 vs. 9/12; RD 6.0% (-23.8% to 35.7%)                                        | I |
| J Chen <sup>15</sup>                               |        | SC | HCQ: [Day 7] 13/15 vs. 14/15; RD -6.7% (-28% to 14.7%)<br>[Day 14] 15/15 vs. 15/15; RD 0% (NA) |   |
| L Chen <sup>16</sup>                               |        | H  | HCQ: [Day 10] 15/15 vs/ 12/12; RD 0% (NA)                                                      |   |
| Tang <sup>34</sup>                                 |        | H  | HCQ: [Day 23] 53/75 vs. 56.75; RD -4% (-18.3% to 10.3%)                                        |   |
| C-P Chen <sup>14</sup>                             | Cohort | C  | HCQ: [Day 14] 12/28 vs. 5/9; RD -12.7% (-50.0% to 24.6%)                                       | I |
| Lecronier <sup>18</sup>                            |        | C  | HCQ: [Day 7] 7/26 vs. 2/14; RD 12.6% (-12.4% to 37.7%)                                         |   |
| Mallat <sup>21</sup>                               |        | S  | HCQ: [Day 14] 11/23 vs. 10/11; RD -43.1% (-69.6% to -16.5%) †                                  |   |
| Gautret <sup>35</sup>                              |        | C  | HCQ±AZ: [Day 6] 14/20 vs. 2/16; RD 57.6% (31.8% to 83.3%) †                                    |   |

RoB: Risk of bias; HCQ: Hydroxychloroquine; SOE: Strength of evidence; 95%CI: 95% confidence interval; RCT: Randomized controlled trial; RD: Absolute risk difference; MD: Mean difference; ARDS: Acute respiratory distress syndrome. † denotes a statistically significant finding. Risk of Bias Codes: SC – some concerns, H– high, M – moderate, S –serious, C – critical, NI – no information; Strength of Evidence Codes: I – insufficient, L- low.

\*adjusted hazard ratio, number of events per treatment group not provided.

\*\*mean difference, mean values and standard deviation per treatment group not provided.
